# Supplementary material for: Ac2-26, an Annexin A1 Peptide, Attenuates Ischemia-Reperfusion-Induced Acute Lung Injury
Source: PubMed Central journal article supplement (PMC5578160; doi:10.3390/ijms18081771), 2017-08-15
Supplement: ijms-18-01771-s001.pdf [file ijms-18-01771-s001.pdf]

# Supplementary Material: Ac2-26, an Annexin A1 Peptide, Attenuates Ischemia/Reperfusion–Induced Acute Lung Injury

Wen-I Liao, Shu-Yu Wu, Geng-Chin Wu, Hsin-Ping Pao, Shih-En Tang, Kun-Lun Huang, and Shi-Jye Chu

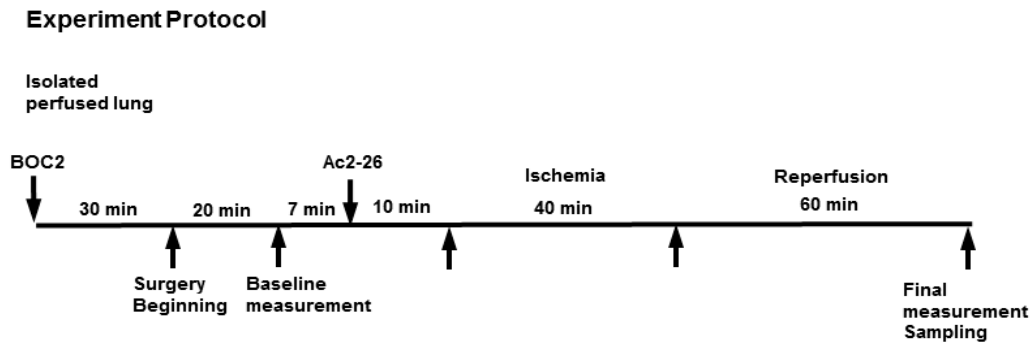

Figure S1. Experimental Protocol.

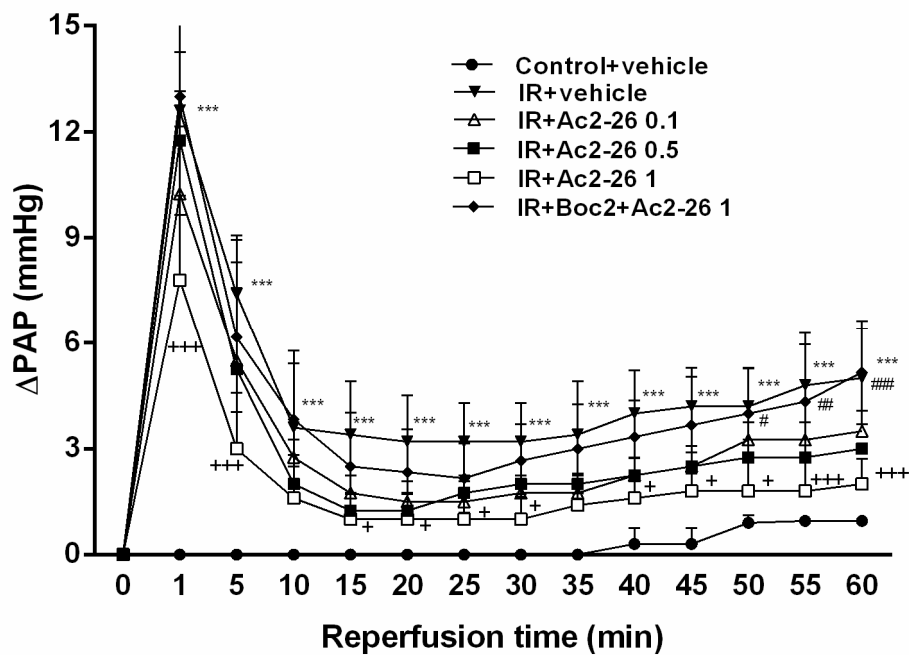

**Figure S2.** Effect of Ac2-26 and Boc2 on pulmonary artery pressure ( $\Delta$ PAP). PAP increased significantly in the ischemia-reperfusion (IR) group. The increase in PAP was attenuated significantly by treatment with Ac2-26, but not when Boc2 was added. Data are expressed as mean  $\pm$  SD ( $n = 6$  per group). \*\*\*  $p < 0.001$ , compared with the control group; +  $p < 0.05$ , ++  $p < 0.01$ , +++  $p < 0.001$ , compared with the IR group; #  $p < 0.05$ , ##  $p < 0.01$ , ###  $p < 0.001$ , compared with the IR-AC2-26 1 group.
